# Supplementary material
Source: Springer Nature journal article supplement (https://www.springermedizin.de/resource/supplementary/12936_2008_756_MOESM4_ESM.pdf/9548994)

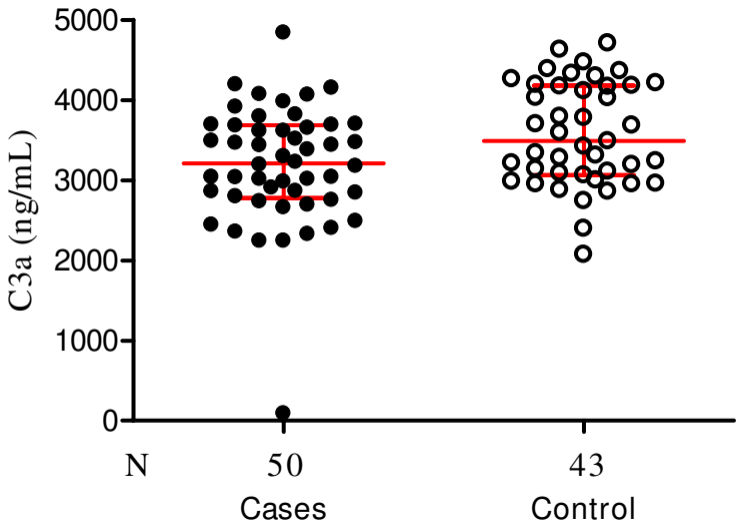

Supplement: MOESM4 [file 9548994]
